68. Asai H, Ikezu S, Woodbury ME, Yonemoto GM, Cui L, Ikezu T: Accelerated neurodegeneration and neuroinflammation in transgenic mice expressing P301L tau mutant and tau-tubulin kinase 1. *Am J Pathol* 2014; 184:808–18
69. Bellucci A, Westwood AJ, Ingram E, Casamenti F, Goedert M, Spillantini MG: Induction of inflammatory mediators and microglial activation in mice transgenic for mutant human P301S tau protein. *Am J Pathol* 2004; 165:1643–52
70. Lee DC, Rizer J, Selenica ML, Reid P, Kraft C, Johnson A, Blair L, Gordon MN, Dickey CA, Morgan D: LPS-induced inflammation exacerbates phospho-tau pathology in rTg4510 mice. *J Neuroinflammation* 2010; 7:56
71. Kitazawa M, Oddo S, Yamasaki TR, Green KN, LaFerla FM: Lipopolysaccharide-induced inflammation exacerbates tau pathology by a cyclin-dependent kinase 5-mediated pathway in a transgenic model of Alzheimer's disease. *J Neurosci* 2005; 25:8843–53
72. Yoshiyama Y, Higuchi M, Zhang B, Huang SM, Iwata N, Saido TC, Maeda J, Suhara T, Trojanowski JQ, Lee VM: Synapse loss and microglial activation precede tangles in a P301S tauopathy mouse model. *Neuron* 2007; 53: 337–51
73. Run X, Liang Z, Zhang L, Iqbal K, Grundke-Iqbal I, Gong CX: Anesthesia induces phosphorylation of tau. *J Alzheimers Dis* 2009; 16:619–26
74. Zhang Y, Dong Y, Zheng H, Shie V, Wang H, Busscher JJ, Yue Y, Xu Z, Xie Z: Sevoflurane inhibits neurogenesis and the Wnt-catenin signaling pathway in mouse neural progenitor cells. *Curr Mol Med* 2013; 13:1446–54
75. Wan Y, Xu J, Meng F, Bao Y, Ge Y, Lobo N, Vizcaychipi MP, Zhang D, Gentleman SM, Maze M, Ma D: Cognitive decline following major surgery is associated with gliosis,  $\beta$ -amyloid accumulation, and  $\tau$  phosphorylation in old mice. *Crit Care Med* 2010; 38:2190–8

## ANESTHESIOLOGY REFLECTIONS FROM THE WOOD LIBRARY-MUSEUM

### Batchelder's "Anaesthesia" Trade Card

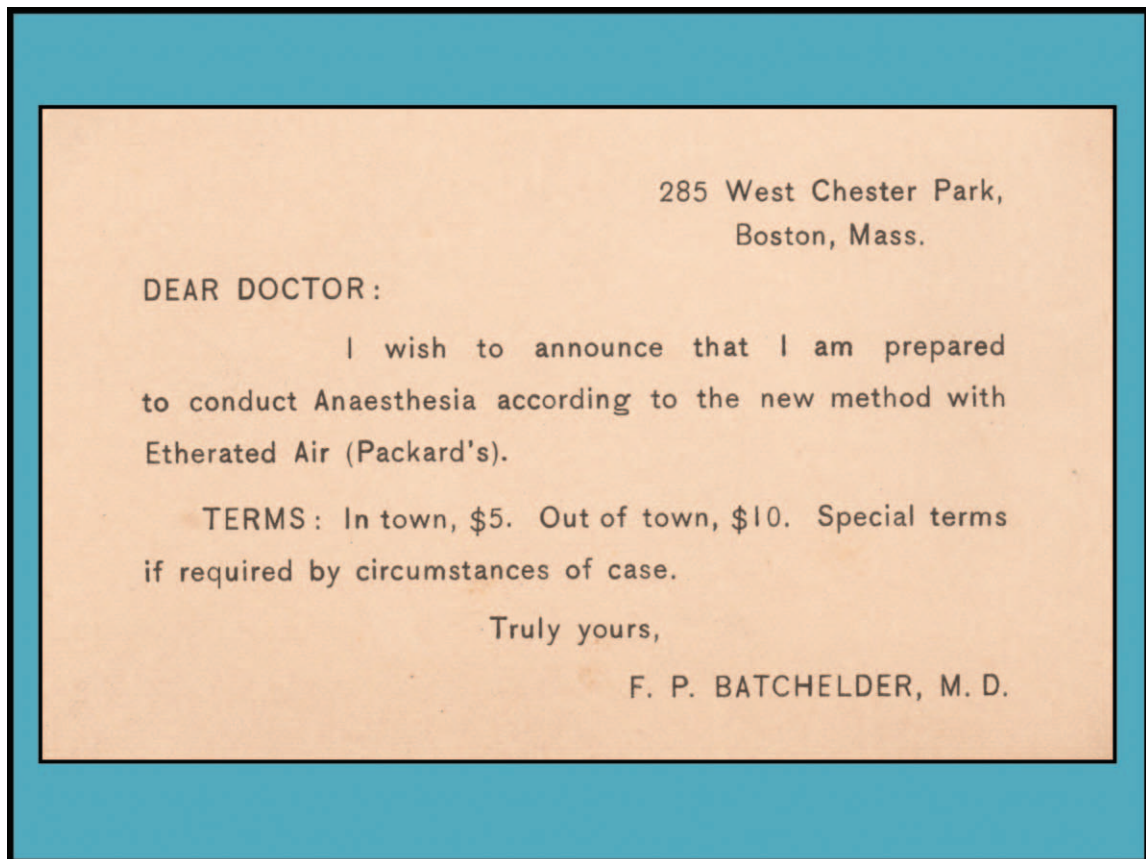

Frederick P. Batchelder, M.D. (1868–1942), was a Bostonian homeopath who chose to specialize in delivering anesthetics. His trade card (*above*) sidesteps the ethics of “physician advertising” by announcing to fellow physicians that Dr. Batchelder was “prepared to conduct Anaesthesia according to the new method with Etherated Air (Packard’s).” By referring to the “new method” (an inhaler) designed ca. 1885 by his fellow Bostonian homeopath Horace Packard, M.D., Dr. Batchelder has helped us date his otherwise dateless trade card. (Copyright © the American Society of Anesthesiologists, Inc.)

George S. Bause, M.D., M.P.H., *Honorary Curator, ASA’s Wood Library-Museum of Anesthesiology, Schaumburg, Illinois, and Clinical Associate Professor, Case Western Reserve University, Cleveland, Ohio. UJYC@aol.com.*
